# Supplementary material for: Cellulose-Multiwall Carbon Nanotube Fiber Actuator Behavior in Aqueous and Organic Electrolyte
Source: MDPI journal article supplement (doi:10.3390/ma13143213), 2020-07-19
Supplement: s1 [file s1]

Article

# Cellulose-multiwall carbon nanotube fiber actuator behavior in aqueous and organic electrolyte

Fred Elhi <sup>1</sup>, Anna-Liisa Peikolainen <sup>1</sup>, Rudolf Kiefer <sup>2,\*</sup> and Tarmo Tamm <sup>1</sup>

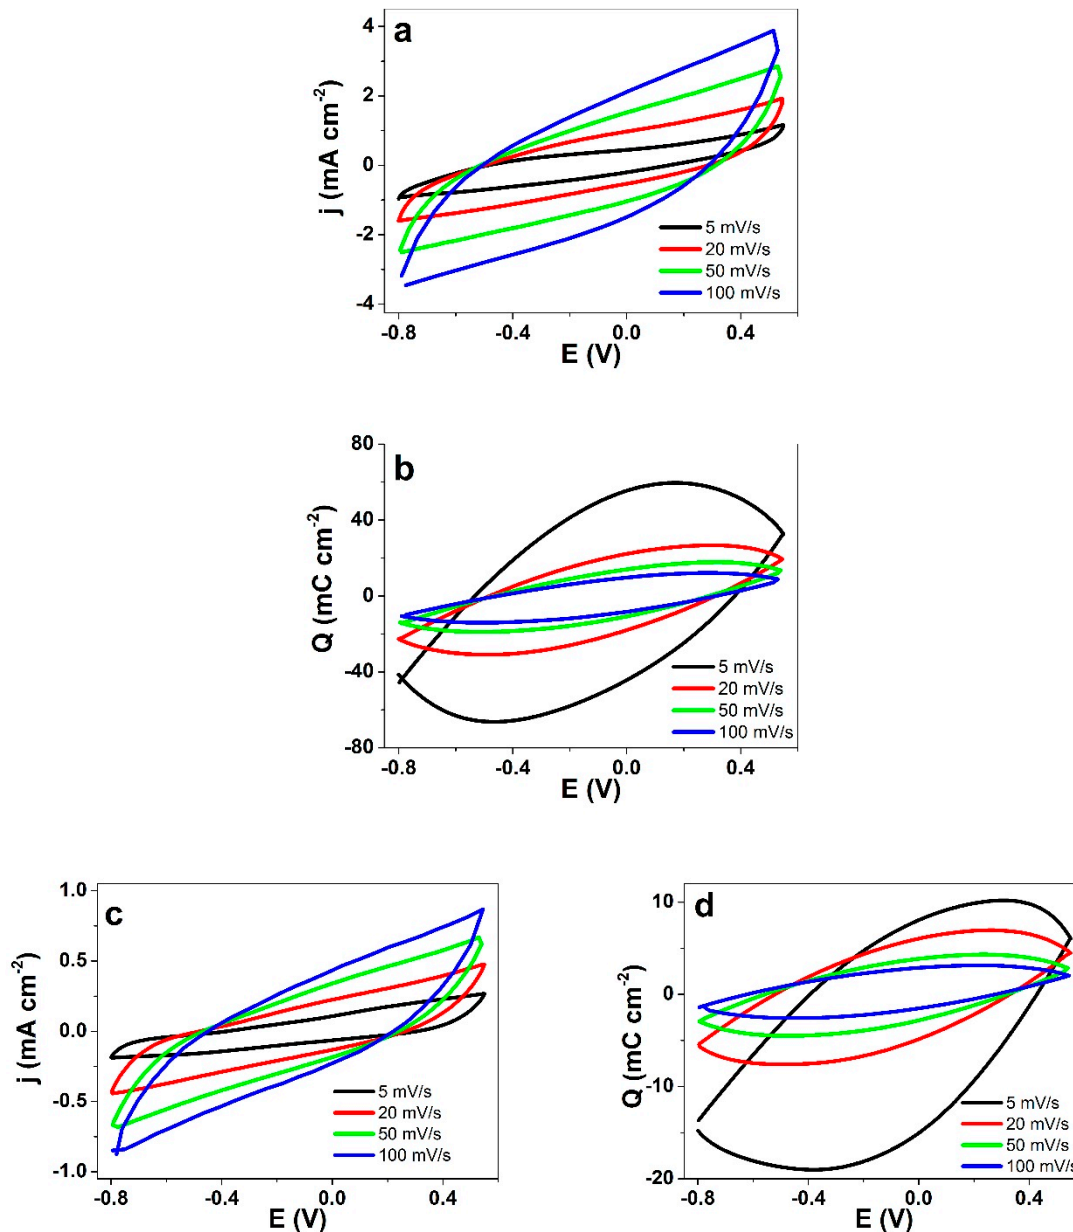

**Figure S1.** Cyclic voltammetric measurements (3rd cycles) of Cell-CNT fibers (working electrode) at different scan rates (5 mV s<sup>-1</sup> (black); 20 mV s<sup>-1</sup> (red); 50 mV s<sup>-1</sup> (green) and 100 mV s<sup>-1</sup> (blue) operated in three-electrode set up with Ag/AgCl (3M KCl) reference electrode and Platinum sheet counter electrode. The current density  $j$  of Cell-CNT in LITFSI-aq is shown in (a) and the charge density  $Q$  in (b). Cell-CNT in LiTFSI-PC electrolyte shows current density  $j$  in (c) and charge density  $Q$  in (d) against the applied potential range 0.55V to -0.8V.

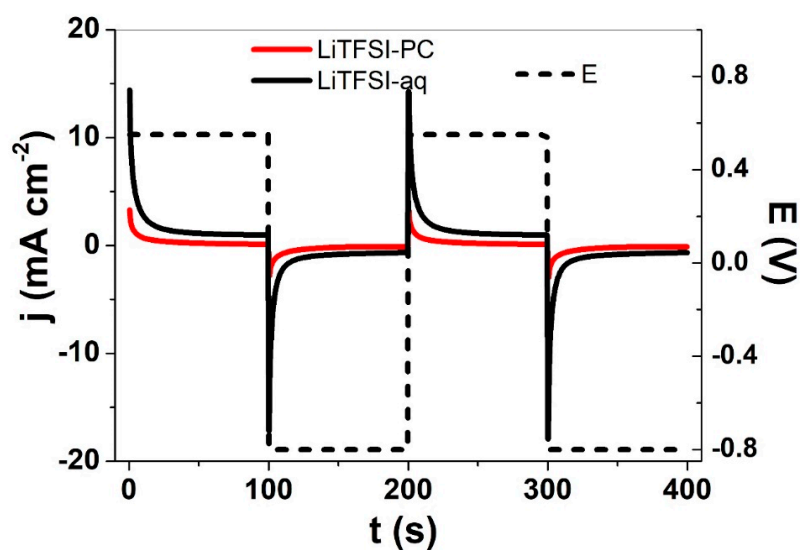

**Figure S2.** Square wave current density curves (two subsequent cycles: 2nd and 3rd) at applied frequency 0.005 Hz and potential range 0.55 to  $-0.8$  V (dashed line) of Cell-CNT fibers in LiTFSI-PC (red, dotted) and LiTFSI-aq (black, line) against time  $t$ .

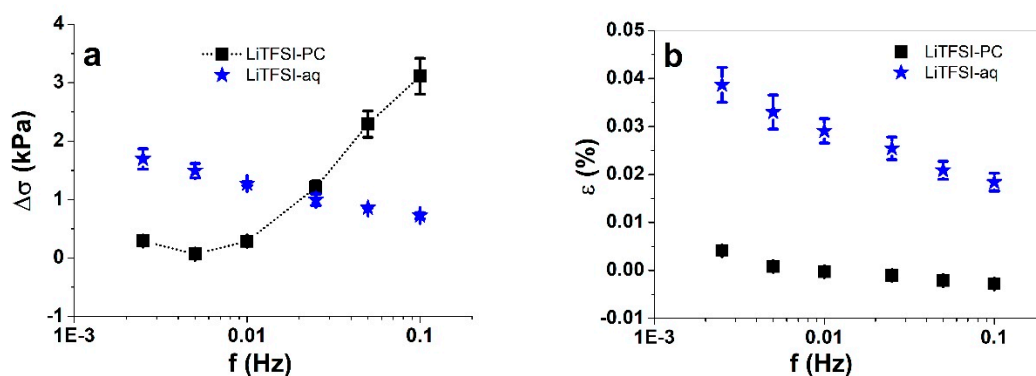

**Figure S3.** Square wave potential measurements of Cell-CNT fibers in potential range 0.55 to  $-0.8$  V using different solvents PC (■) and aq (★) with same salt LiTFSI showing in a: stress difference  $\Delta\sigma$  and in b: strain  $\epsilon$  against applied frequencies (logarithmic scale).

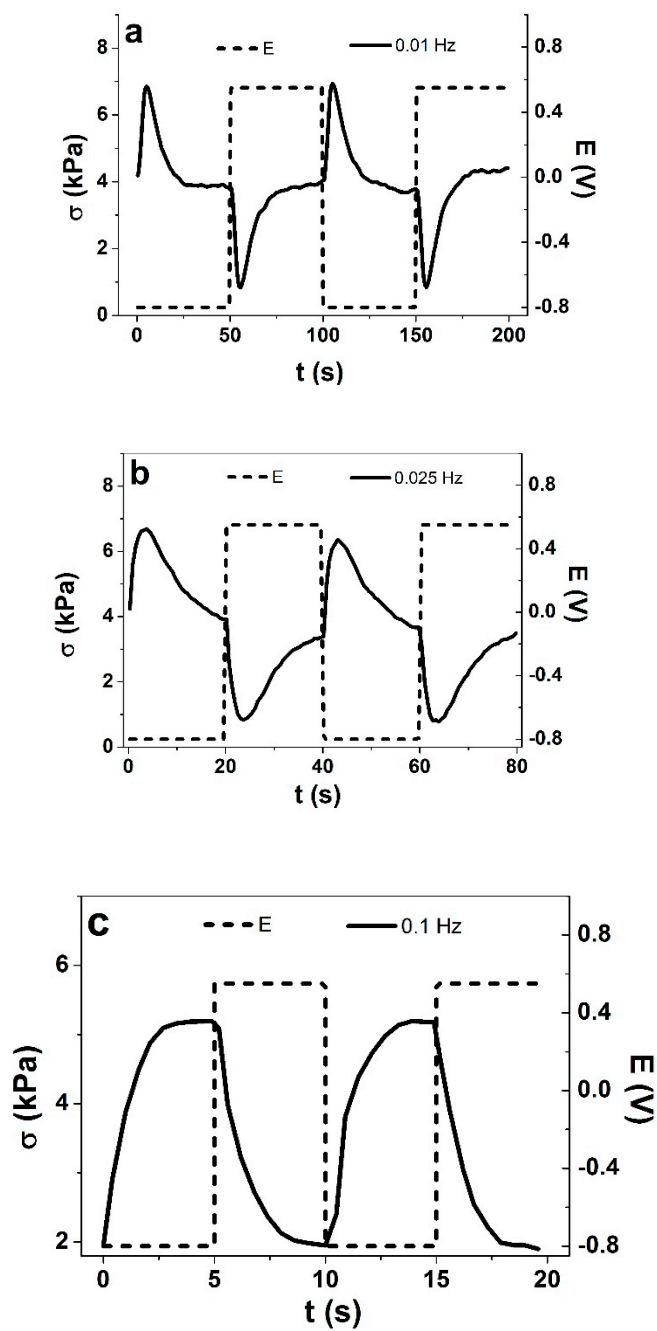

**Figure S4.** Linear actuation of stress  $\sigma$  (black line, two subsequent cycles 3rd and 4th) at applied square wave potential measurements of Cell-CNT fibers in potential range 0.55 to -0.8 V ( $E$ , dashed line) against time  $t$  in LiTFSI-PC at different frequencies of a: 0.01 Hz, b: 0.025 Hz and c: 0.1 Hz.

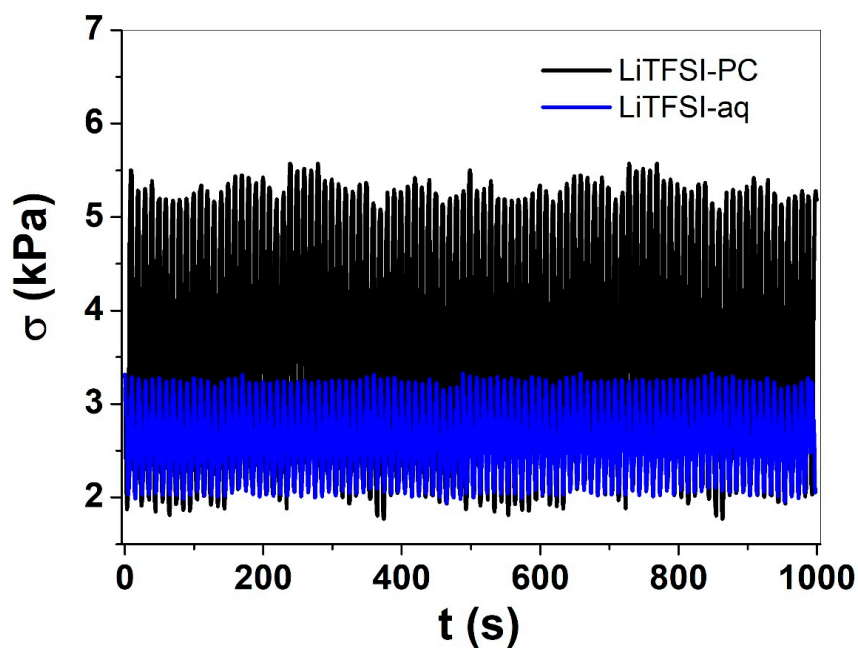

**Figure S5.** Square wave potential steps (0.1 Hz frequency) of Cell-CNT fibers in LiTFSI-PC (black line) and in LiTFSI-aq (blue line) revealing stress  $\sigma$  against time  $t$ .

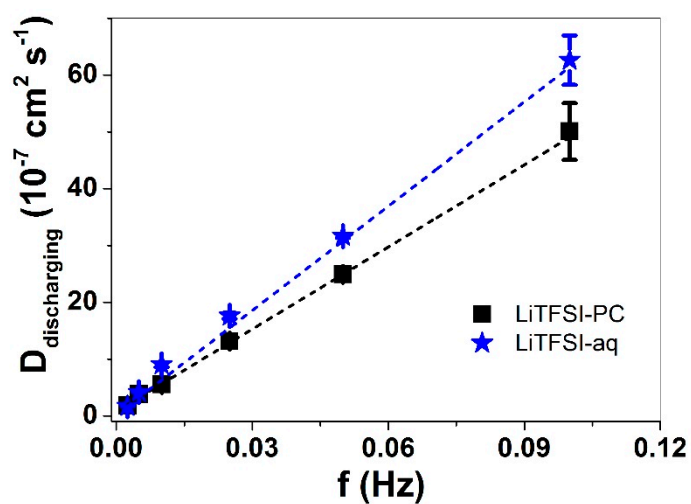

**Figure S6.** Diffusion coefficients  $D$  in Cell-CNT fibers in LiTFSI-PC (■) and LiTFSI-aq (★) electrolytes against frequency upon discharging. The linear fits (dashed) are shown here only for orientation.
